# Supplementary material for: Multiplex bisulfite PCR resequencing of clinical FFPE DNA
Source: PubMed Central journal article supplement (PMC4389706; doi:10.1186/s13148-015-0067-3), 2015-03-17

### Methylated Controls

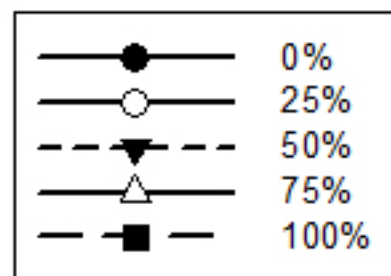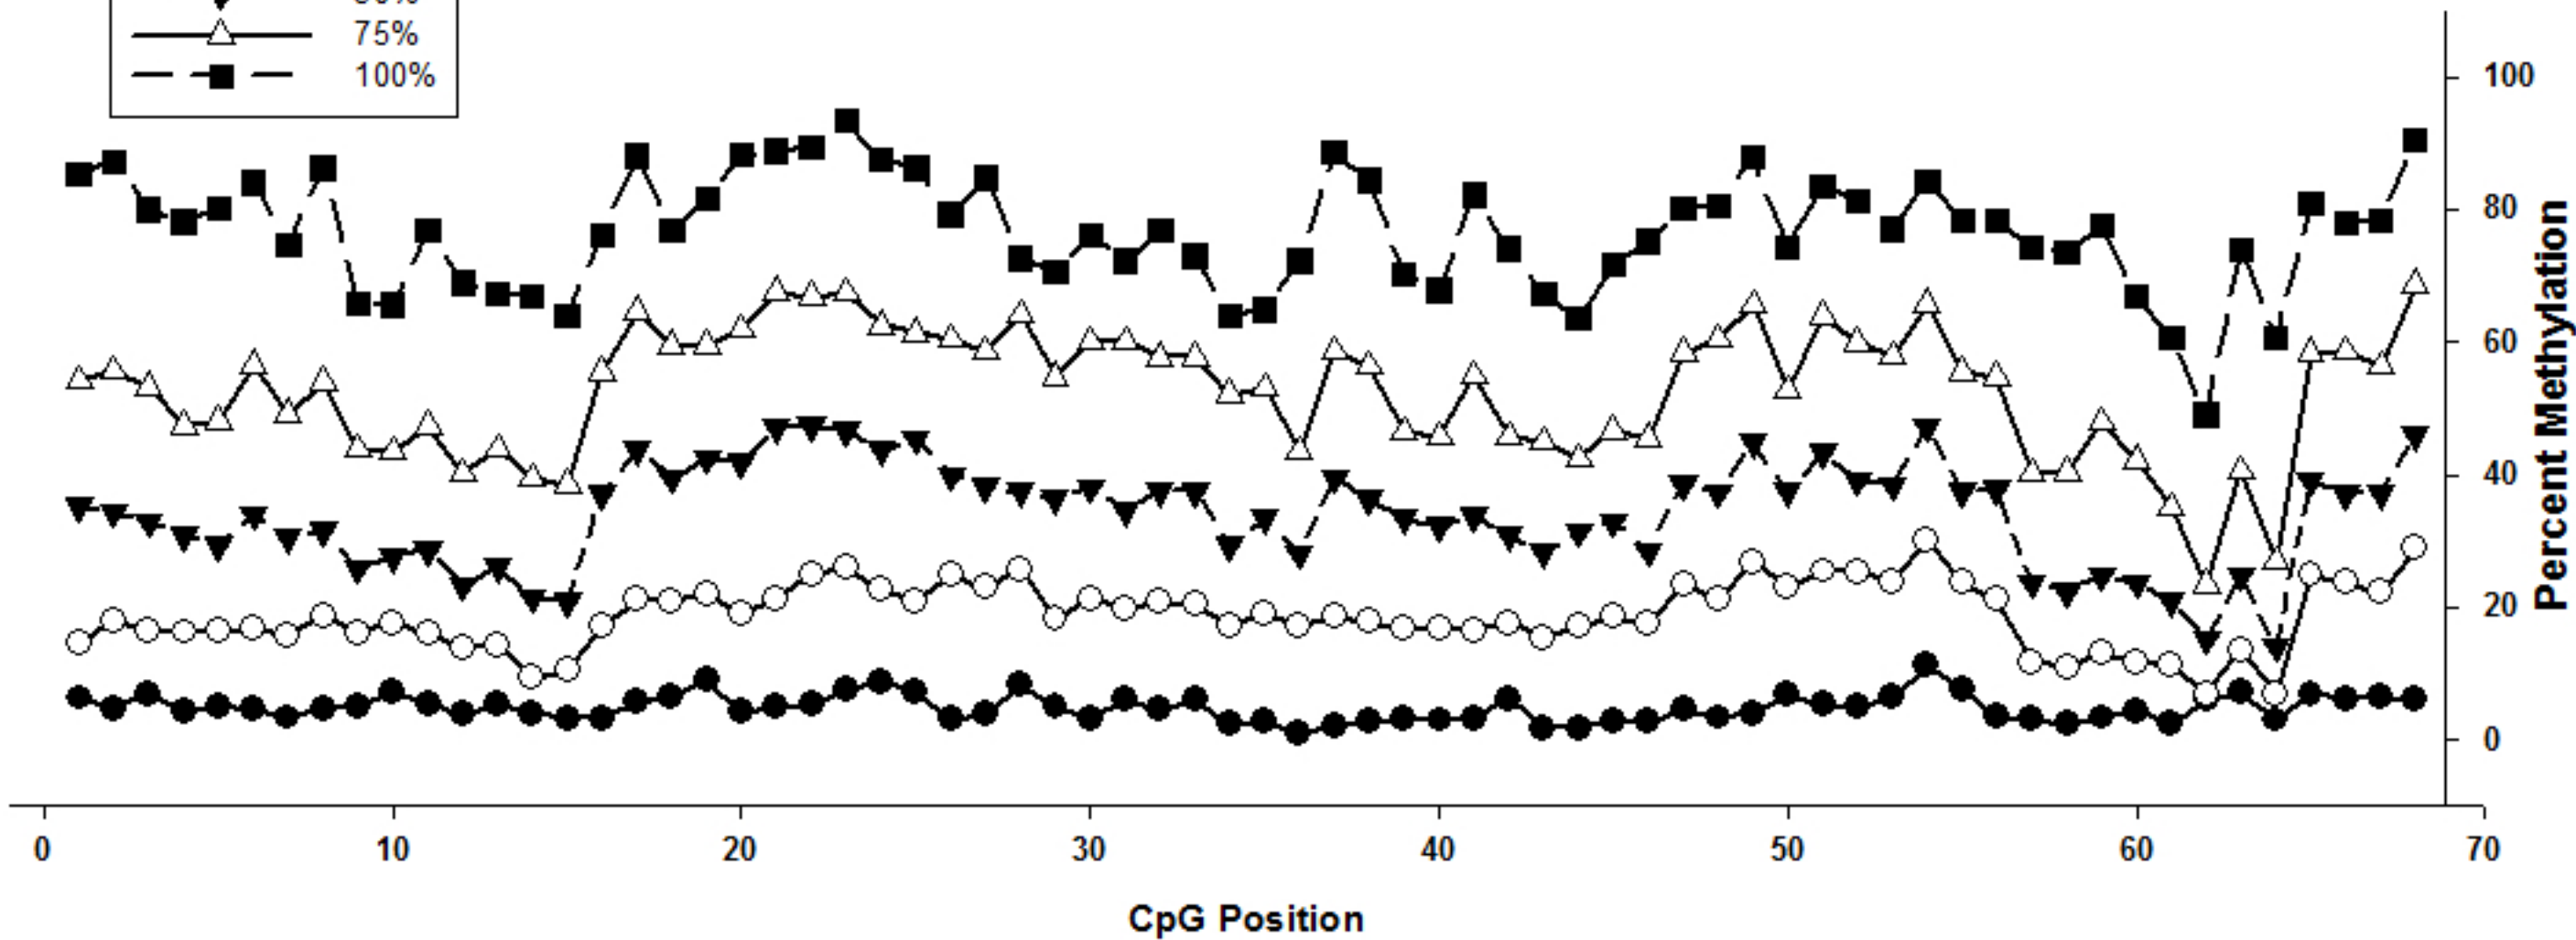

Supplement: 13148_2015_67_MOESM4_ESM.pdf [file 13148_2015_67_MOESM4_ESM.pdf]
